# Supplementary material for: Year-Round Reproduction and Induced Spawning of Chinese Amphioxus, Branchiostoma belcheri, in Laboratory
Source: PLoS One. 2013 Sep 26;8(9):e75461. doi: 10.1371/journal.pone.0075461 (PMC3784433; doi:10.1371/journal.pone.0075461)
Supplement: Table S1 — Recurring spawning in B . japonicum reared under three different temperatures. The experiment was set on 24th Nov. 2011 and data collection was started from 6th Feb. 2012 when most animals began to develop their gonads. On each data collecting date, animal number in each reproductive phase was recorded. Abbreviations: Dev, Development; Spa, Spawning. (DOC) [file pone.0075461.s002.doc]

**Table S1. Recurring spawning in *B. japonicum* reared under three different temperatures.**

| **Date** | **18-19˚C** | | | | | | **Room temperature** | | | | | | **25-27˚C** | | | | | |
| --- | --- | --- | --- | --- | --- | --- | --- | --- | --- | --- | --- | --- | --- | --- | --- | --- | --- | --- |
| **Undeveloped** | **1st Dev** | **1st Spa** | **2nd Dev** | **2nd Spa** | **Total No.** | **Undeveloped** | **1st Dev** | **1st Spa** | **2nd Dev** | **2nd Spa** | **Total No.** | **Undeveloped** | **1st Dev** | **1st Spa** | **2nd Dev** | **2nd Spa** | **Total No.** |
| 6-Feb-12 | 20 | 58 |  |  |  | 78 | 11 | 77 |  |  |  | 88 | 5 | 82 |  |  |  | 87 |
| 26-Feb-12 | 8 | 70 |  |  |  | 78 | 1 | 87 |  |  |  | 88 | 1 | 45 | 41 |  |  | 87 |
| 20-Mar-12 | 0 | 67 | 11 |  |  | 78 | 0 | 75 | 13 |  |  | 88 | 1 | 24 | 19 | 32 | 11 | 87 |
| 7-Apr-12 |  | 31 | 47 |  |  | 78 |  | 10 | 75 |  |  | 85 | 1 | 3 | 39 | 6 | 38 | 87 |
| 19-Apr-12 |  | 9 | 69 |  |  | 78 |  |  | 85 |  |  | 85 | 1 | 3 | 39 | 6 | 38 | 87 |
| 4-May-12 |  | 8 | 69 |  |  | 77 |  |  | 69 | 16 |  | 85 |  |  | 42 |  | 42 | 84 |
| 18-May-12 |  | 8 | 69 |  |  | 77 |  |  | 69 | 1 | 15 | 85 |  |  | 39 |  | 42 | 81 |
| 6-Jun-12 |  | 8 | 69 |  |  | 77 |  |  | 69 |  | 16 | 85 |  |  | 39 |  | 42 | 81 |
| 26-Jun-12 |  | 8 | 69 |  |  | 77 |  |  | 69 |  | 16 | 85 |  |  | 39 |  | 42 | 81 |
| 26-Jul-12 |  | 8 | 69 |  |  | 77 |  |  | 69 |  | 16 | 85 |  |  | 39 |  | 42 | 81 |
| **Since all animals of the three groups have no gonadal development within the last two months, we mixed and redistrubed each group of animals, and re-started our records after 26th, Jul. 2013.** | | | | | | | | | | | | | | | | | | |
| 30-Aug-12 | 58 | 19 |  |  |  | 77 | 64 | 16 |  |  |  | 80 | 58 | 22 |  |  |  | 80 |
| 14-Sep-12 | 58 | 19 |  |  |  | 77 | 63 | 16 |  |  |  | 79 | 57 | 23 |  |  |  | 80 |
| 29-Sep-12 | 45 | 32 |  |  |  | 77 | 55 | 24 |  |  |  | 79 | 36 | 44 |  |  |  | 80 |
| 14-Oct-12 | 43 | 34 |  |  |  | 77 | 47 | 32 |  |  |  | 79 | 29 | 51 |  |  |  | 80 |
| 29-Oct-12 | 24 | 53 |  |  |  | 77 | 30 | 49 |  |  |  | 79 | 9 | 70 |  |  |  | 79 |
| 13-Nov-12 | 12 | 65 |  |  |  | 77 | 26 | 53 |  |  |  | 79 | 7 | 70 |  |  |  | 77 |
| 28-Nov-12 | 12 | 65 |  |  |  | 77 | 17 | 62 |  |  |  | 79 | 6 | 70 |  |  |  | 76 |
| 20-Dec-12 | 11 | 66 |  |  |  | 77 | 13 | 66 |  |  |  | 79 | 5 | 71 |  |  |  | 76 |
| 3-Jan-13 | 11 | 66 |  |  |  | 77 | 13 | 66 |  |  |  | 79 | 5 | 71 |  |  |  | 76 |
| 19-Jan-13 | 4 | 71 | 2 |  |  | 77 | 8 | 71 |  |  |  | 79 | 5 | 71 |  |  |  | 76 |
| 2-Feb-13 | 4 | 68 | 5 |  |  | 77 | 8 | 71 |  |  |  | 79 | 5 | 66 | 4 |  |  | 75 |
| 21-Feb-13 | 2 | 66 | 9 |  |  | 77 | 4 | 75 |  |  |  | 79 | 3 | 46 | 26 |  |  | 75 |
| 7-Mar-13 | 2 | 66 | 9 |  |  | 77 | 2 | 77 |  |  |  | 79 | 3 | 36 | 22 | 13 |  | 74 |
| 22-Mar-13 | 2 | 66 | 9 |  |  | 77 | 2 | 70 | 7 |  |  | 79 | 2 | 13 | 41 | 17 |  | 73 |

Note: The experiment was set on 24th Nov. 2011 and data collection was started from 6th Feb. 2012 when most animals began to develop their gonads. On each data collecting date, animal number in each **reproductive phase was recorded.** Abbreviations: Dev, Development; Spa, Spawning.
